# Supplementary material for: The Mitochondrial-Derived Peptide Humanin Protects RPE Cells From Oxidative Stress, Senescence, and Mitochondrial Dysfunction
Source: PubMed Central journal article supplement — Invest Ophthalmol Vis Sci. 2016 Mar 18;57(3):1238–53. doi: 10.1167/iovs.15-17053 (PMC4811181; doi:10.1167/iovs.15-17053), 2016-03-18
Supplement: i1552-5783-57-3-1238-s01.pdf [file i1552-5783-57-3-1238-s01.pdf]

**Supplementary fig. 1**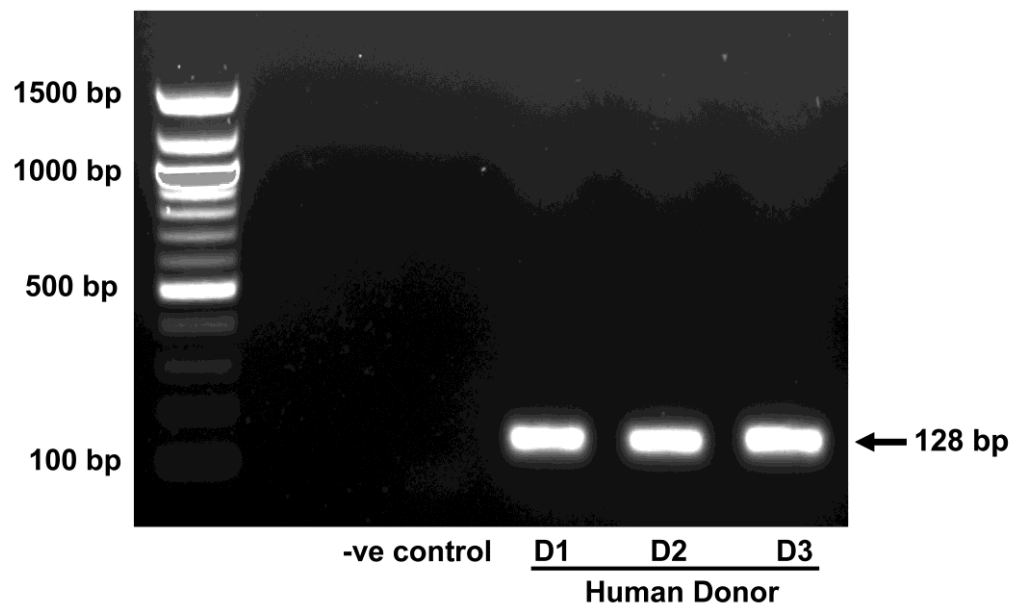**Supplementary Fig. 1. RPE cells express mitochondrial transcripts for HN.**

PCR showing mitochondrial HN transcripts from three independent samples derived from 3 donors (D1-D3). Primer pairs used are stated in the results section.

## Supplementary Fig. 2

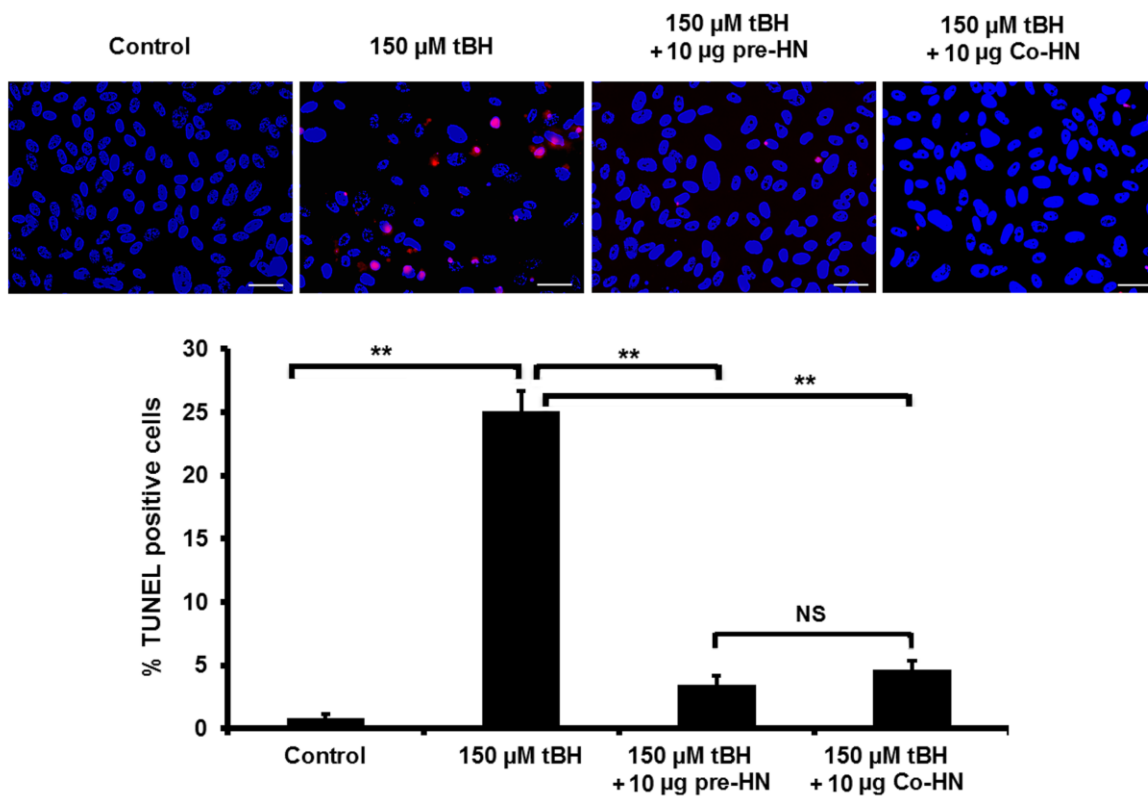

### Supplementary Fig. 2. Pre- or co-treatment of RPE with HN similarly protect from oxidant stress.

Effect of pre- treatment and co-treatment of HN on RPE cell survival. Non-polarized RPE cells were either pre-treated overnight or co-treated with 10 $\mu\text{g}$  HN and 150  $\mu\text{M}$  tBH for 24h. TUNEL staining is shown in A and B shows quantification of percentage of TUNEL positive cells from three experiments. \*\* $P < 0.01$ . NS: not significant. Scale bar = 10  $\mu\text{m}$ .

### Supplementary Figure 3

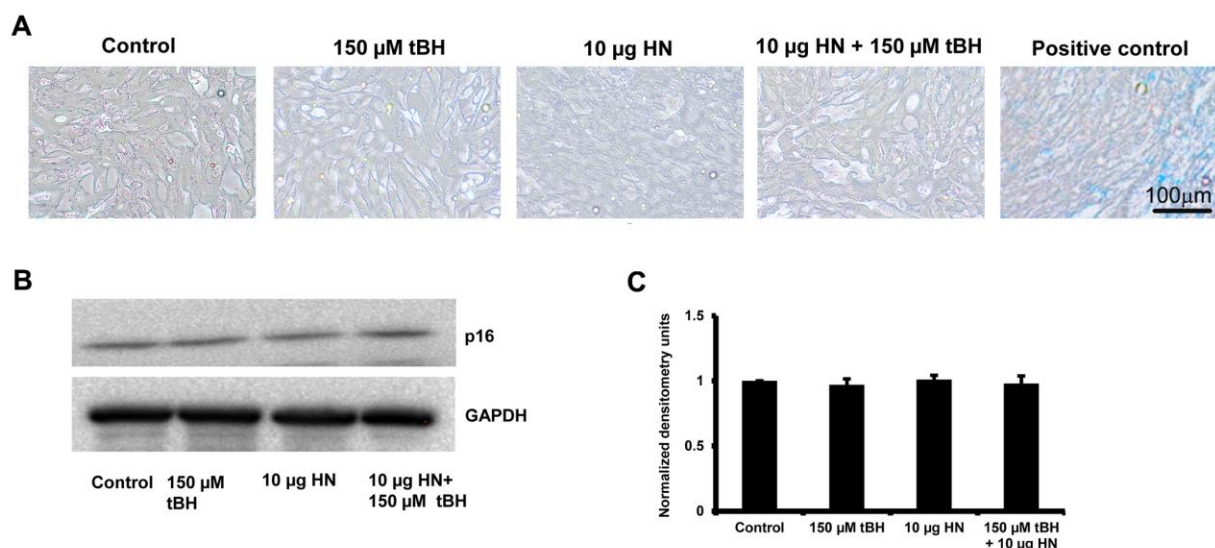

### Supplementary Fig. 3.

#### Short-term oxidative stress does not induce senescence in RPE cells

RPE cells were treated with 150  $\mu$ M tBH or 150  $\mu$ M tBH plus 10  $\mu$ g/ml HN for 24 h and processed for SA- $\beta$ -Gal staining or P16<sup>INK4a</sup> immunoblot. As a positive control, RPE cells were treated with 30  $\mu$ M tBH for 2 h, allowed to recover in fresh medium with 10% fetal bovine serum for 22 h. The procedure was repeated and a complete experiment comprised of five sequential tBH treatments.<sup>6</sup> (**A**, **B**) No significant change in the number of SA- $\beta$ -Gal positive cells nor of p16<sup>INK4a</sup> protein regulation was found with 150  $\mu$ M tBH treatment for 24 h. Sequential tBH (30  $\mu$ M) treatment induced senescence in RPE cells (**A**). Scale bar = 100  $\mu$ m.
